# Supplementary material for: The impact of an indeno[1,2-b]thiophene spacer on dye-sensitized solar cell performances of cyclic thiourea functionalized organic sensitizers
Source: Royal Society of Chemistry journal article supplement (doi:10.1039/c4ta02473g), 2014-06-10

## Supporting Information

# Impact of an Indeno[1,2-*b*]thiophene spacer on Dye-sensitized Solar Cells Performances of Cyclic Thiourea Functionalized Organic Sensitizers

Hyeju Choi,<sup>a</sup> Minkyung Shin,<sup>b</sup> Kihyung Song,<sup>b</sup> Moon-Sung Kang,<sup>c</sup> Youngjin Kang,<sup>d,\*</sup> Jaejung Ko<sup>a,\*</sup>

<sup>a</sup> Department of Advanced Material Chemistry, Korea University, 2511, Sejong-ro, Sejong City 339-700, Republic of Korea. Fax: 82-44-860-1331; Tel: 82-44-860-1337; E-mail: jko@korea.ac.kr

<sup>b</sup> Department of Chemical Education, Korea National University of Education, Cheongwon, Chungbuk Province 363-791, Republic of Korea.

<sup>c</sup> Department of Environmental Engineering, Sangmyung University, 31 Sangmyungdae-gil, Dongnam-gu, Cheonan, Chungnam Province 330-720, Republic of Korea.

<sup>d</sup> Division of Science Education, Kangwon National University, Chuncheon 200-701, Republic of Korea.

## Contents

Figure S1. Dihedral angle of **JK-313** and **JK-314**

2

Figure S1. Figure S1. Dihedral angle of JK-313 and JK-314.

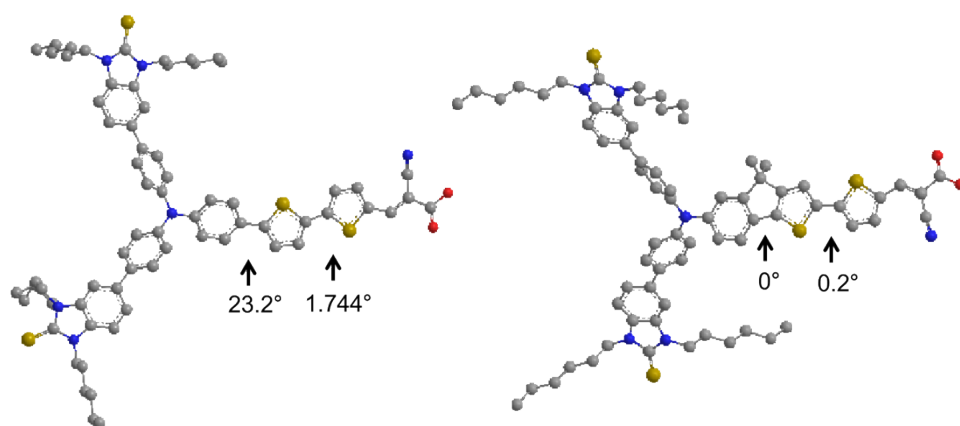

Supplement: c4ta02473g1.pdf [file c4ta02473g1.pdf]
